# Supplementary material for: Synthesis of a novel hydrazone-based compound applied as a fluorescence turn-on chemosensor for iron(iii) and a colorimetric sensor for copper(ii) with antimicrobial, DFT and molecular docking studies
Source: Royal Society of Chemistry journal article supplement (doi:10.1039/d3ra04364a), 2023-01-01
Supplement: d3ra04364a1.pdf [file d3ra04364a1.pdf]

## Synthesis, DFT, Antimicrobial and Molecular docking studies of Novel thiophene hydrazone ligand with Fluorescence turn-on response of Fe(III) and colorimetric detection of Cu(II).

Sharmin Akther Rupa<sup>1</sup>, Md Abdul Majed Patwary<sup>1,\*</sup>, William Emmanuel Ghann<sup>2</sup>, Adams Abdullahi<sup>2</sup>, A. K. M. Royhan Uddin<sup>1</sup>, Md. Mayez Mahmud<sup>3</sup>, Md. Aminul Haque<sup>4</sup>, Jamal Uddin<sup>2,\*</sup>

<sup>1</sup>Department of Chemistry, Comilla University, Cumilla-3506, Bangladesh.

<sup>2</sup>Center for Nanotechnology, Department of Natural Sciences, Coppin State University, Baltimore, MD, USA.

<sup>3</sup>Tokushima University, Faculty of Pharmaceutical Science, Tokushima Shi 770-0026, Japan

<sup>4</sup>Department of Chemistry, Jagannath University, Dhaka-1100, Bangladesh

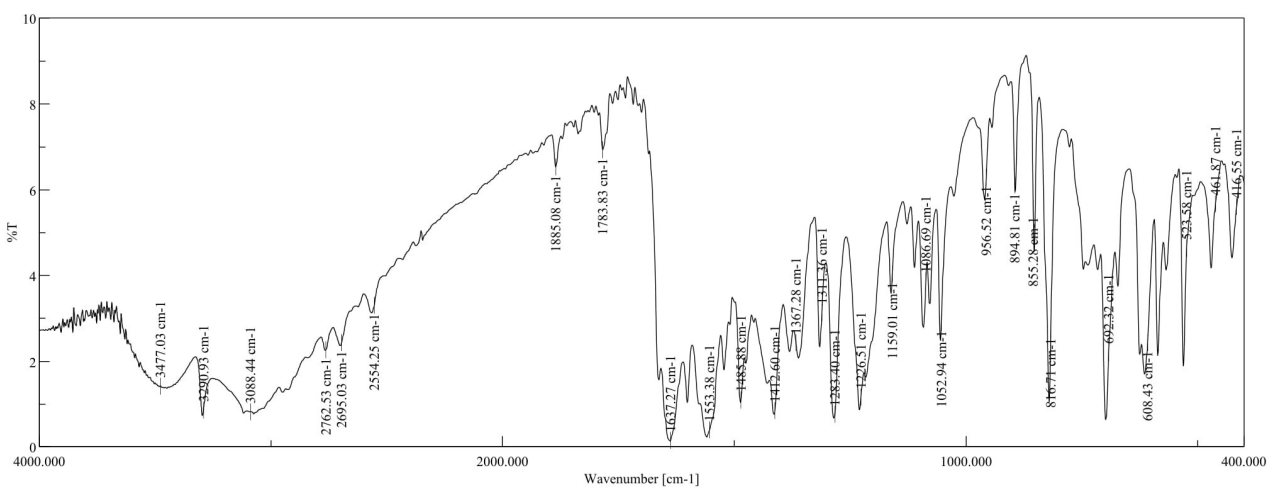

Fig. S1. FT-IR of L.

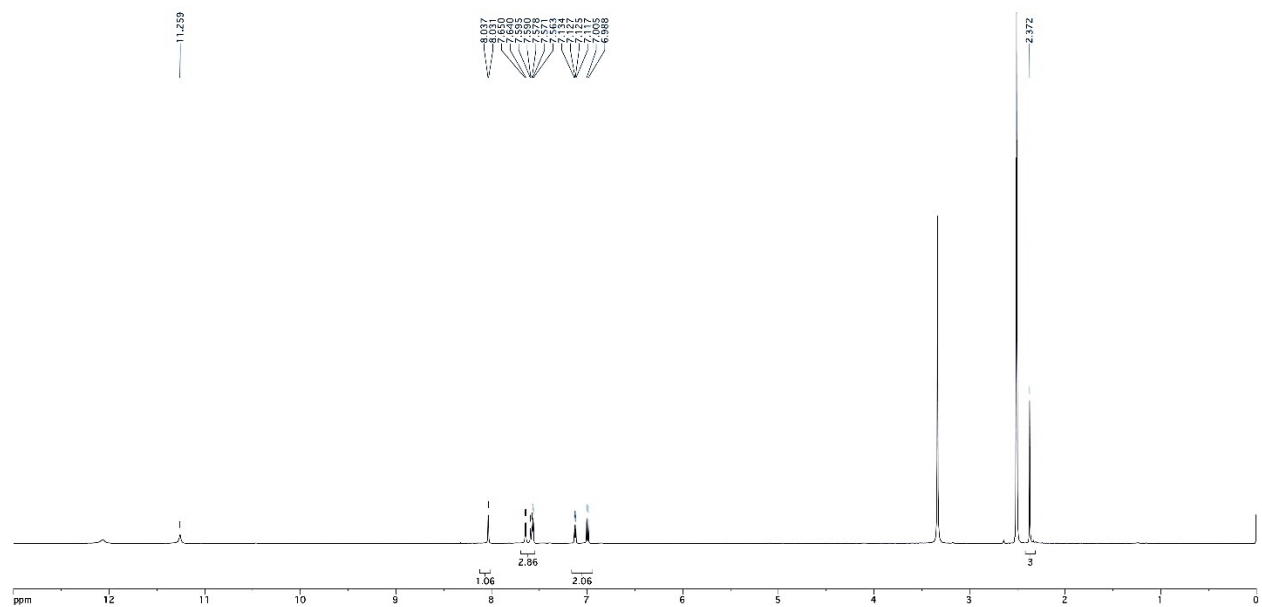

Fig. S2.  $^1\text{H}$  NMR of L.

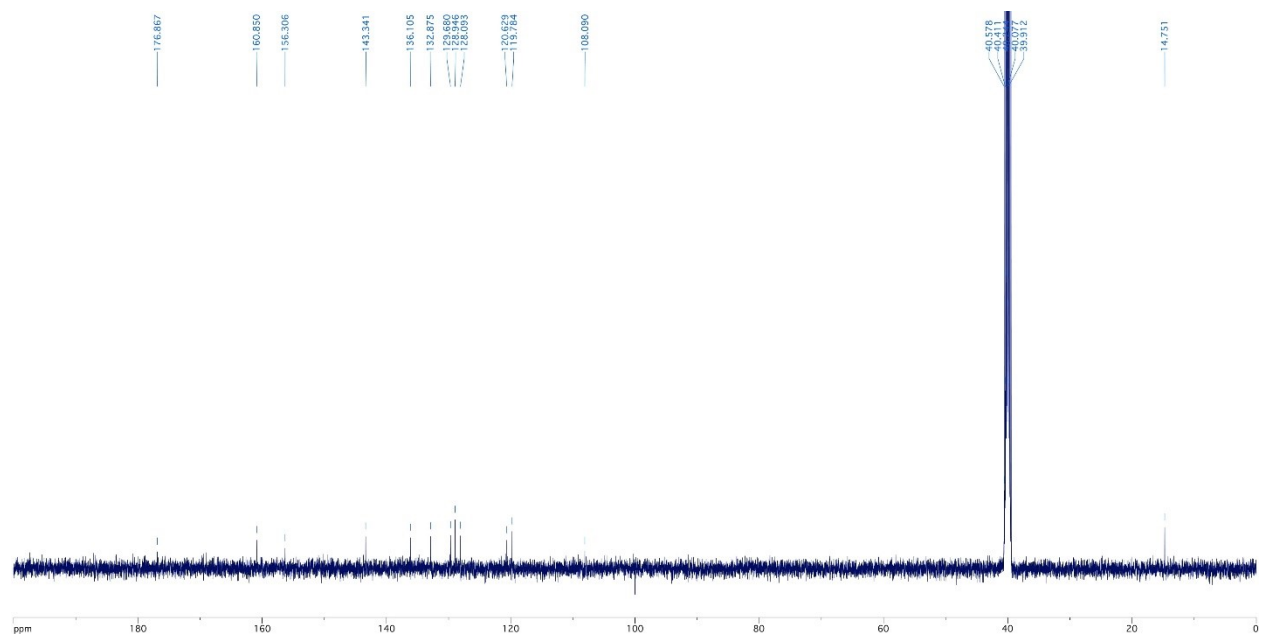

Fig. S3.  $^{13}\text{C}$  NMR of L.

Tolerance = 100.0 mDa / DBE: min = -1.5, max = 50.0  
Selected filters: None

Monoisotopic Mass, Even Electron Ions

1 formula(e) evaluated with 0 results within limits (all results (up to 1000) for each mass)

Elements Used:

C: 13-13 H: 11-11 N: 2-2 O: 2-2 P: 1-1 S: 1-1 Br: 1-1

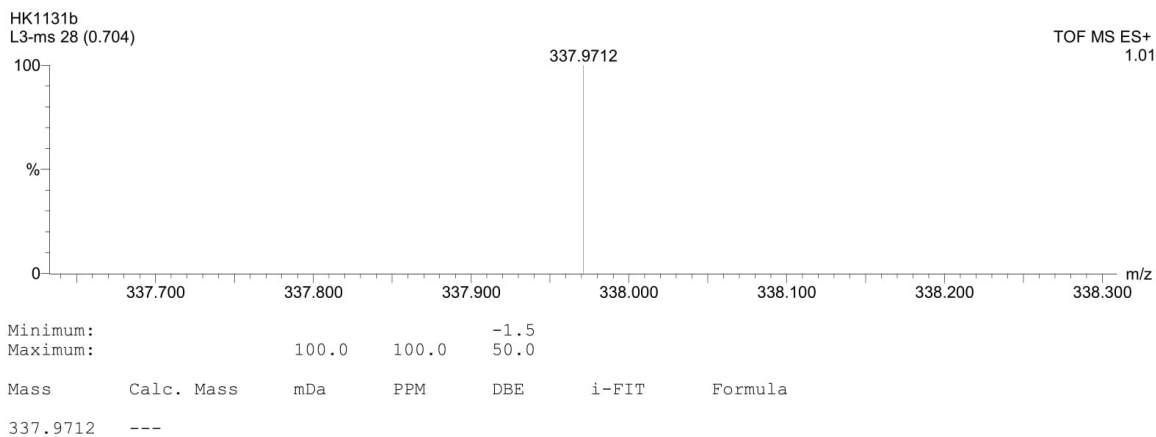

Fig. S4. Mass Spectra of **L**.

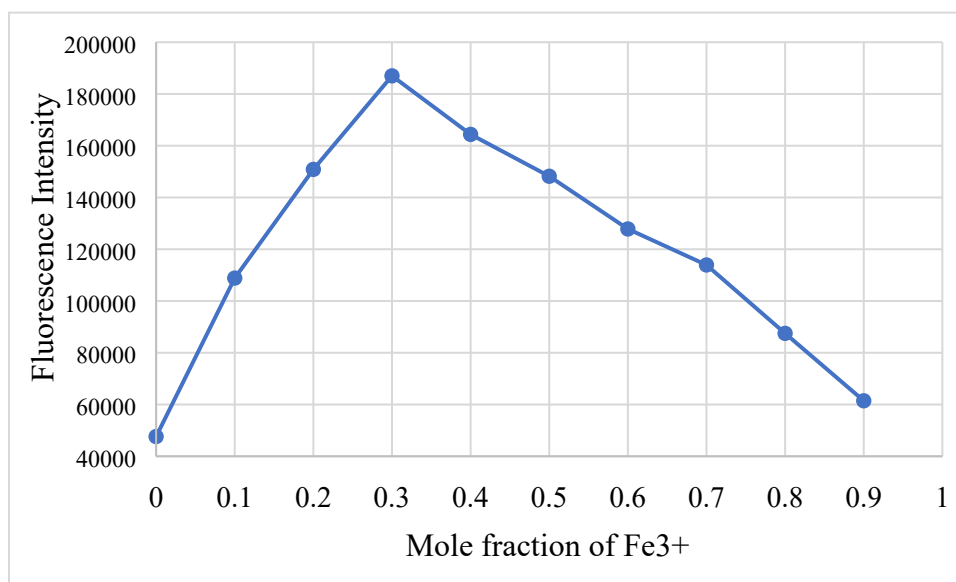

Fig. S5. Job plot for the reaction of **L** with Fe<sup>3+</sup>. Fluorescent emission at 550 nm was plotted as a function of the molar ratio  $[\text{Fe}^{3+}]/([\text{L}]+[\text{Fe}^{3+}])$ .

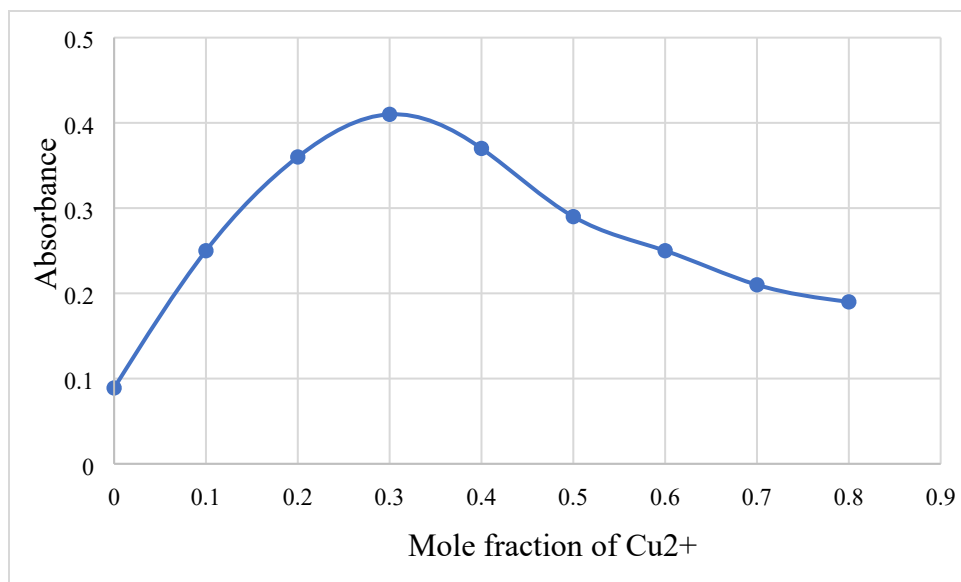

Fig. S6. Job's plot according to the method of continuous variations, indicating the 1:2 stoichiometry for L + Cu<sup>2+</sup>
